# Supplementary material for: Pericardial effusion after definitive concurrent chemotherapy and intensity modulated radiotherapy for esophageal cancer
Source: PubMed Central journal article supplement (PMC7045635; doi:10.1186/s13014-020-01498-3), 2020-02-27
Supplement: 13014_2020_1498_MOESM5_ESM.pdf [file 13014_2020_1498_MOESM5_ESM.pdf]

**Additional file 5****Table S4.** Multivariate Analysis of Clinical and Dose-volume Variables Associated with Pericardial Effusion  $\geq$  Grade 3

|                | <b>Variables</b>                      | <b>HR</b> | <b>95% CI</b> | <b>P value</b> |
|----------------|---------------------------------------|-----------|---------------|----------------|
| <b>Model A</b> | Gender (female vs. male)              | 2.313     | 0.154-34.652  | 0.544          |
|                | Location (L/M vs. U)                  | 6.803     | 0.775-59.712  | 0.084          |
|                | Alcohol (yes vs. no)                  | 0.193     | 0.024-1.582   | 0.125          |
|                | Cardiovascular disease (yes vs. no)   | 0.000     | 0.000-.       | 0.990          |
|                | Heart V60 (> 26.00 vs. $\leq$ 26.00%) | 5.495     | 0.967-31.234  | 0.055          |
| <b>Model B</b> | Gender (female vs. male)              | 0.340     | 0.011-10.438  | 0.537          |
|                | Location (L/M vs. U)                  | 1.367     | 0.073-25.712  | 0.835          |
|                | Alcohol (yes vs. no)                  | 0.051     | 0.003-0.988   | 0.049          |
|                | Cardiovascular disease (yes vs. no)   | 0.000     | 0.000-.       | 0.990          |
|                | PC V30 (> 65.80 vs. $\leq$ 65.80%)    | 32.309    | 2.311-451.777 | 0.010          |
| <b>Model C</b> | Gender (female vs. male)              | 0.440     | 0.020-9.898   | 0.605          |
|                | Location (L/M vs. U)                  | 2.283     | 0.194-26.940  | 0.512          |
|                | Alcohol (yes vs. no)                  | 0.097     | 0.008-1.143   | 0.064          |
|                | Cardiovascular disease (yes vs. no)   | 0.000     | 0.000-.       | 0.990          |
|                | PC V40 (> 55.35 vs. $\leq$ 55.35%)    | 16.715    | 2.307-121.093 | 0.005          |
| <b>Model D</b> | Gender (female vs. male)              | 2.319     | 0.161-33.495  | 0.537          |
|                | Location (L/M vs. U)                  | 7.144     | 0.814-62.723  | 0.076          |
|                | Alcohol (yes vs. no)                  | 0.189     | 0.024-1.495   | 0.114          |
|                | Cardiovascular disease (yes vs. no)   | 0.000     | 0.000-.       | 0.991          |
|                | PC V60 (> 24.70 vs. $\leq$ 24.70%)    | 7.545     | 1.293-44.011  | 0.025          |

Abbreviations: *L* lower thoracic esophagus, *M* middle thoracic esophagus, *PC* pericardium, *U* upper thoracic esophagus, *V<sub>x</sub>* percentage of the heart or pericardium volume receiving more than x gray
