# Supplementary material for: Pericardial effusion after definitive concurrent chemotherapy and intensity modulated radiotherapy for esophageal cancer
Source: Springer Nature journal article supplement (doi:10.1186/s13014-020-01498-3), 2020-02-27
Supplement: MOESM2 [file 17748654]

## **Additional file 2**

**Table S1.** Summary of the Chemotherapy Regimens

| <b>Chemotherapy regimen</b>                                                                                                  | <b>Number (%)</b> |
|------------------------------------------------------------------------------------------------------------------------------|-------------------|
| P (25 mg/m <sup>2</sup> ) + F (1000 mg/m <sup>2</sup> ) QW                                                                   | 61 (48.4)         |
| P (20 mg/m <sup>2</sup> daily, D1–4) + F (800 mg/m <sup>2</sup> daily, D1–4) Q4W                                             | 31 (24.6)         |
| P (25-40 mg/m <sup>2</sup> ) + F (2000-2600 mg/m <sup>2</sup> ) + L (200-300 mg/m <sup>2</sup> ) Q2W                         | 9 (7.1)           |
| P (20-25 mg/m <sup>2</sup> ) + F (1500-2000 mg/m <sup>2</sup> ) + L (150-200 mg/m <sup>2</sup> ) QW                          | 9 (7.1)           |
| P (25 mg/m <sup>2</sup> ) + F (2000 mg/m <sup>2</sup> ) + L (200 mg/m <sup>2</sup> ) + Cet (400 → 250 mg/m <sup>2</sup> ) QW | 1 (0.8)           |
| P (20 mg/m <sup>2</sup> ) + F (1600 mg/m <sup>2</sup> ) + L (160 mg/m <sup>2</sup> ) + E (30 mg/m <sup>2</sup> ) QW          | 1 (0.8)           |
| P (25 mg/m <sup>2</sup> ) + F (2000 mg/m <sup>2</sup> ) + Epirubicin (30 mg/m <sup>2</sup> ) Q2W                             | 1 (0.8)           |
| F (1600 mg/m <sup>2</sup> ) QW                                                                                               | 1 (0.8)           |
| TS-1 (Tegafur/gimeracil/oteracil) 100 mg/day                                                                                 | 1 (0.8)           |
| F (2000 mg/m <sup>2</sup> ) + Carboplatin (AUC 4) Q2W                                                                        | 1 (0.8)           |
| F (1600 mg/m <sup>2</sup> ) + L (160 mg/m <sup>2</sup> ) QW                                                                  | 1 (0.8)           |
| F (2400 mg/m <sup>2</sup> ) + L (400 mg/m <sup>2</sup> ) + Oxaliplatin (85 mg/m <sup>2</sup> ) Q2W                           | 1 (0.8)           |
| T (80 mg/m <sup>2</sup> ) + P (15 mg/m <sup>2</sup> ) QW                                                                     | 2 (1.6)           |
| T (50 mg/m <sup>2</sup> ) + Carboplatin (AUC 2) QW                                                                           | 1 (0.8)           |
| T (35 mg/m <sup>2</sup> ) + P (15 mg/m <sup>2</sup> ) + Cet (400 → 250 mg/m <sup>2</sup> ) QW                                | 1 (0.8)           |
| P (40 mg/m <sup>2</sup> ) QW                                                                                                 | 2 (1.6)           |
| Docetaxel (35 mg/m <sup>2</sup> ) + P (35 mg/m <sup>2</sup> ) + F (1500 mg/m <sup>2</sup> ) Q2W                              | 1 (0.8)           |
| T (110 mg/m <sup>2</sup> ) + P (40 mg/m <sup>2</sup> ) + F (3000 mg/m <sup>2</sup> ) + L (400 mg/m <sup>2</sup> ) Q2W        | 1 (0.8)           |

Abbreviations: *Cet* cetuximab, *D* day, *E* etoposide, *F* fluorouracil, *L* leucovorin, *P* cisplatin, *QW* weekly, *Q2W* every 2 weeks, *Q4W* every 4 weeks, *T* paclitaxel
