# Supplementary material for: Pericardial effusion after definitive concurrent chemotherapy and intensity modulated radiotherapy for esophageal cancer
Source: Springer Nature journal article supplement (doi:10.1186/s13014-020-01498-3), 2020-02-27
Supplement: MOESM3 [file 17748654]

**Additional file 3****Table S2.** Multivariate Analysis of Clinical and Heart Dose-volume Variables Associated with Pericardial Effusion of Any Grade

|                | Variables                                | HR     | 95% CI       | P value |
|----------------|------------------------------------------|--------|--------------|---------|
| <b>Model A</b> | Gender (female vs. male)                 | 2.210  | 0.512-9.542  | 0.288   |
|                | Location (L/M vs. U)                     | 1.647  | 0.752-3.607  | 0.212   |
|                | Alcohol (yes vs. no)                     | 0.396  | 0.134-1.168  | 0.093   |
|                | Cardiovascular disease (yes vs. no)      | 0.000  | 0.000-.      | 0.975   |
|                | Mean heart dose (> 23.45 vs. ≤ 23.45 Gy) | 9.792  | 2.930-32.724 | <0.001  |
| <b>Model B</b> | Gender (female vs. male)                 | 1.780  | 0.442-7.168  | 0.418   |
|                | Location (L/M vs. U)                     | 1.426  | 0.637-3.190  | 0.388   |
|                | Alcohol (yes vs. no)                     | 0.381  | 0.135-1.080  | 0.069   |
|                | Cardiovascular disease (yes vs. no)      | 0.000  | 0.000-.      | 0.974   |
|                | Heart V5 (> 76.55 vs. ≤ 76.55%)          | 6.670  | 2.172-20.481 | 0.001   |
| <b>Model C</b> | Gender (female vs. male)                 | 1.770  | 0.442-7.088  | 0.420   |
|                | Location (L/M vs. U)                     | 1.541  | 0.686-3.458  | 0.295   |
|                | Alcohol (yes vs. no)                     | 0.382  | 0.136-1.075  | 0.068   |
|                | Cardiovascular disease (yes vs. no)      | 0.000  | 0.000-.      | 0.975   |
|                | Heart V10 (> 68.15 vs. ≤ 68.15%)         | 7.292  | 2.370-22.439 | 0.001   |
| <b>Model D</b> | Gender (female vs. male)                 | 1.913  | 0.473-7.735  | 0.363   |
|                | Location (L/M vs. U)                     | 1.459  | 0.684-3.111  | 0.329   |
|                | Alcohol (yes vs. no)                     | 0.345  | 0.121-0.981  | 0.046   |
|                | Cardiovascular disease (yes vs. no)      | 0.000  | 0.000-.      | 0.974   |
|                | Heart V20 (> 50.70 vs. ≤ 50.70%)         | 10.681 | 2.844-40.111 | <0.001  |
| <b>Model E</b> | Gender (female vs. male)                 | 1.936  | 0.478-7.834  | 0.354   |
|                | Location (L/M vs. U)                     | 1.425  | 0.670-3.030  | 0.358   |
|                | Alcohol (yes vs. no)                     | 0.350  | 0.123-0.997  | 0.049   |
|                | Cardiovascular disease (yes vs. no)      | 0.000  | 0.000-.      | 0.974   |
|                | Heart V30 (> 33.55 vs. ≤ 33.55%)         | 10.813 | 2.897-40.360 | <0.001  |
| <b>Model F</b> | Gender (female vs. male)                 | 1.701  | 0.432-6.697  | 0.447   |
|                | Location (L/M vs. U)                     | 1.809  | 0.754-4.343  | 0.185   |
|                | Alcohol (yes vs. no)                     | 0.441  | 0.159-1.224  | 0.116   |
|                | Cardiovascular disease (yes vs. no)      | 0.000  | 0.000-.      | 0.975   |
|                | Heart V40 (> 27.90 vs. ≤ 27.90%)         | 7.191  | 2.487-20.796 | <0.001  |
| <b>Model G</b> | Gender (female vs. male)                 | 1.718  | 0.427-6.920  | 0.446   |
|                | Location (L/M vs. U)                     | 1.310  | 0.564-3.045  | 0.530   |
|                | Alcohol (yes vs. no)                     | 0.427  | 0.151-1.206  | 0.108   |

|                |                                     |       |              |       |
|----------------|-------------------------------------|-------|--------------|-------|
|                | Cardiovascular disease (yes vs. no) | 0.000 | 0.000-.      | 0.975 |
|                | Heart V50 (> 10.55 vs. ≤ 10.55%)    | 4.977 | 1.790-13.842 | 0.002 |
| <b>Model H</b> | Gender (female vs. male)            | 1.770 | 0.426-7.349  | 0.432 |
|                | Location (L/M vs. U)                | 1.725 | 0.794-3.746  | 0.168 |
|                | Alcohol (yes vs. no)                | 0.480 | 0.166-1.384  | 0.174 |
|                | Cardiovascular disease (yes vs. no) | 0.000 | 0.000-.      | 0.976 |
|                | Heart V60 (> 9.30 vs. ≤ 9.30%)      | 1.407 | 0.674-2.937  | 0.363 |

Abbreviations: *Gy* gray, *L* lower thoracic esophagus, *M* middle thoracic esophagus, *U* upper thoracic esophagus, *Vx* percentage of the heart volume receiving more than x gray
