# Supplementary material for: Pericardial effusion after definitive concurrent chemotherapy and intensity modulated radiotherapy for esophageal cancer
Source: Springer Nature journal article supplement (doi:10.1186/s13014-020-01498-3), 2020-02-27
Supplement: MOESM4 [file 17748654]

**Additional file 4****Table S3.** Multivariate Analysis of Clinical and Pericardium Dose-volume Variables Associated with Pericardial Effusion of Any Grade

|                | <b>Variables</b>                      | <b>HR</b> | <b>95% CI</b> | <b>P value</b> |
|----------------|---------------------------------------|-----------|---------------|----------------|
| <b>Model A</b> | Gender (female vs. male)              | 2.190     | 0.507-9.464   | 0.294          |
|                | Location (L/M vs. U)                  | 1.669     | 0.759-3.671   | 0.203          |
|                | Alcohol (yes vs. no)                  | 0.390     | 0.132-1.152   | 0.088          |
|                | Cardiovascular disease (yes vs. no)   | 0.000     | 0.000-.       | 0.975          |
|                | Mean PC dose (> 20.33 vs. ≤ 20.33 Gy) | 9.597     | 2.850-32.310  | <0.001         |
| <b>Model B</b> | Gender (female vs. male)              | 1.639     | 0.417-6.439   | 0.479          |
|                | Location (L/M vs. U)                  | 1.882     | 0.738-4.803   | 0.186          |
|                | Alcohol (yes vs. no)                  | 0.443     | 0.160-1.221   | 0.115          |
|                | Cardiovascular disease (yes vs. no)   | 0.000     | 0.000-.       | 0.974          |
|                | PC V5 (> 84.50 vs. ≤ 84.50%)          | 6.408     | 2.194-18.713  | 0.001          |
| <b>Model C</b> | Gender (female vs. male)              | 1.898     | 0.464-7.761   | 0.373          |
|                | Location (L/M vs. U)                  | 1.227     | 0.576-2.613   | 0.595          |
|                | Alcohol (yes vs. no)                  | 0.339     | 0.118-0.973   | 0.044          |
|                | Cardiovascular disease (yes vs. no)   | 0.000     | 0.000-.       | 0.974          |
|                | PC V10 (> 48.50 vs. ≤ 48.50%)         | 8.507     | 2.271-31.863  | 0.001          |
| <b>Model D</b> | Gender (female vs. male)              | 1.888     | 0.467-7.642   | 0.373          |
|                | Location (L/M vs. U)                  | 1.387     | 0.652-2.950   | 0.395          |
|                | Alcohol (yes vs. no)                  | 0.342     | 0.121-0.972   | 0.044          |
|                | Cardiovascular disease (yes vs. no)   | 0.000     | 0.000-.       | 0.974          |
|                | PC V20 (> 42.55 vs. ≤ 42.55%)         | 10.324    | 2.780-38.343  | <0.001         |
| <b>Model E</b> | Gender (female vs. male)              | 1.839     | 0.456-7.418   | 0.392          |
|                | Location (L/M vs. U)                  | 1.441     | 0.662-3.140   | 0.358          |
|                | Alcohol (yes vs. no)                  | 0.365     | 0.129-1.034   | 0.058          |
|                | Cardiovascular disease (yes vs. no)   | 0.000     | 0.000-.       | 0.974          |
|                | PC V30 (> 33.35 vs. ≤ 33.35%)         | 8.269     | 2.503-27.319  | 0.001          |
| <b>Model F</b> | Gender (female vs. male)              | 1.657     | 0.424-6.476   | 0.468          |
|                | Location (L/M vs. U)                  | 1.936     | 0.767-4.886   | 0.162          |
|                | Alcohol (yes vs. no)                  | 0.462     | 0.168-1.275   | 0.136          |
|                | Cardiovascular disease (yes vs. no)   | 0.000     | 0.000-.       | 0.974          |
|                | PC V40 (> 28.90% vs. ≤ 28.90%)        | 7.064     | 2.430-20.540  | <0.001         |
| <b>Model G</b> | Gender (female vs. male)              | 1.573     | 0.402-6.151   | 0.515          |
|                | Location (L/M vs. U)                  | 1.575     | 0.605-4.105   | 0.352          |
|                | Alcohol (yes vs. no)                  | 0.527     | 0.192-1.449   | 0.215          |

|                |                                     |       |              |       |
|----------------|-------------------------------------|-------|--------------|-------|
|                | Cardiovascular disease (yes vs. no) | 0.000 | 0.000-.      | 0.978 |
|                | PC V50 (> 21.45 vs. ≤ 21.45%)       | 5.312 | 1.977-14.274 | 0.001 |
| <b>Model H</b> | Gender (female vs. male)            | 1.780 | 0.427-7.416  | 0.429 |
|                | Location (L/M vs. U)                | 1.739 | 0.811-3.725  | 0.155 |
|                | Alcohol (yes vs. no)                | 0.470 | 0.163-1.353  | 0.162 |
|                | Cardiovascular disease (yes vs. no) | 0.000 | 0.000-.      | 0.976 |
|                | PC V60 (> 11.10 vs. ≤ 11.10%)       | 1.406 | 0.689-2.868  | 0.349 |

Abbreviations: *Gy* gray, *L* lower thoracic esophagus, *M* middle thoracic esophagus, *PC* pericardium, *U* upper thoracic esophagus, *V<sub>x</sub>* percentage of the pericardium volume receiving more than x gray
