# Supplementary material for: Pericardial effusion after definitive concurrent chemotherapy and intensity modulated radiotherapy for esophageal cancer
Source: Springer Nature journal article supplement (doi:10.1186/s13014-020-01498-3), 2020-02-27
Supplement: MOESM6 [file 17748654]

**Additional file 6****Table S5.** Clinical Information of 8 Patients with Pericardial Effusion  $\geq$  Grade 3

| <b>Patient</b> | <b>Symptoms</b>            | <b>Electrocardiography</b>                        | <b>Echocardiography</b>                                         | <b>Pleural effusion</b> | <b>Treatment</b>        |
|----------------|----------------------------|---------------------------------------------------|-----------------------------------------------------------------|-------------------------|-------------------------|
| 1              | Dyspnea                    | Sinus rhythm, low voltage QRS complexes           | Large pericardial effusion with RA and RV collapse              | Bilateral               | Pericardial window      |
| 2              | Dyspnea                    | Not available                                     | Thickened pericardium and pericardial effusion with RA collapse | Bilateral               | Conservative management |
| 3              | Dyspnea                    | Sinus rhythm, low voltage in frontal leads        | Pericardial effusion                                            | Bilateral               | Conservative management |
| 4              | Dyspnea, orthopnea         | Sinus tachycardia, low voltage in frontal leads   | Large pericardial effusion with RV collapse                     | Bilateral               | Pericardiocentesis      |
| 5              | Dyspnea, lower limbs edema | Atrial fibrillation, low voltage in frontal leads | Large pericardial effusion with RA and RV collapse              | Left                    | Pericardiocentesis      |
| 6              | Dyspnea, palpitation       | Atrial fibrillation                               | Large pericardial effusion with RV collapse                     | No                      | Pericardial window      |
| 7              | Dyspnea, chest pain        | Sinus rhythm, low voltage in frontal leads        | Large pericardial effusion with RV collapse                     | No                      | Pericardial window      |
| 8              | Dyspnea                    | Sinus tachycardia                                 | Large pericardial effusion                                      | No                      | Conservative management |

Abbreviations: *RA* right atrium, *RV* right ventricle
